# Supplementary material for: Elevated pyrimidine dimer formation at distinct genomic bases underlies promoter mutation hotspots in UV-exposed cancers
Source: PubMed Central journal article supplement (PMC6329521; doi:10.1371/journal.pgen.1007849), 2018-12-26

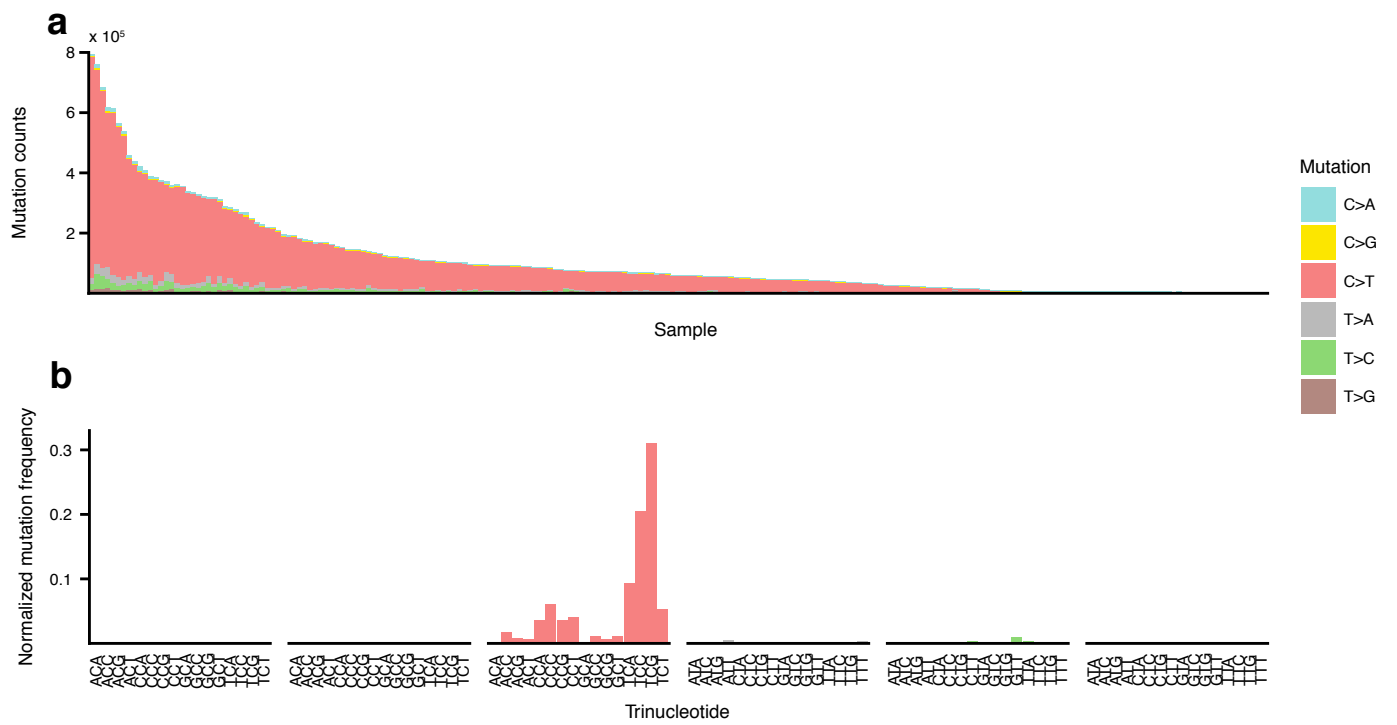

Supplement: pgen.1007849.s001.pdf [file pgen.1007849.s001.pdf]
