# Supplementary material for: Elevated pyrimidine dimer formation at distinct genomic bases underlies promoter mutation hotspots in UV-exposed cancers
Source: PubMed Central journal article supplement (PMC6329521; doi:10.1371/journal.pgen.1007849), 2018-12-26
Supplement: pgen.1007849.s005.pdf [file pgen.1007849.s005.pdf]

| Cell line | Gene               | hg19 position  | Protein substitution | Nucleotide substitution |
|-----------|--------------------|----------------|----------------------|-------------------------|
| XP12RO    | <i>XPA</i>         | Chr9:100447259 | p.R207X              | c.619 C>T               |
| GM16094   | <i>ERCC8 (CSA)</i> | Chr5:60200621  | p.Y145X              | c.435 T>G               |
| GM16095   | <i>ERCC6 (CSB)</i> | Chr10:50732467 | p.K337X              | c.1009 A>T              |
| GM15983   | <i>XPC</i>         | Chr3:14199740  | p.V548delTG          | c.1643_1644delTG        |

**S2 Table. Cell lines with DNA repair deficiencies and their verified homozygous mutations**
