# Supplementary material for: Elevated pyrimidine dimer formation at distinct genomic bases underlies promoter mutation hotspots in UV-exposed cancers
Source: PubMed Central journal article supplement (PMC6329521; doi:10.1371/journal.pgen.1007849), 2018-12-26
Supplement: pgen.1007849.s006.pdf [file pgen.1007849.s006.pdf]

| Primers        | Sequence                                                                                       |
|----------------|------------------------------------------------------------------------------------------------|
| ARC141/<br>142 | 5'-GTGACTGGAGTTCAGACGTGTGCTCTTCCGATCT*T-3'                                                     |
|                | 5'-/5Phos/AGATCGGAAGAGCACACGTCTGAACTCCAGTCAC/3AmMO/-3'                                         |
| ARC143/<br>144 | 5'-/5Biosg/ACACTCTTTCCTACACGACGCTCTTCCGATCTNNNNNN/3AmMO/-3'                                    |
|                | 5'-/5Phos/AGATCGGAAGAGCGTCGTGTAGGGAAAGAGTGT/3AmMO/-3'                                          |
| ARC154         | 5'-ACACTCTTTCCTACACGACGCTCTTCCGATCT-3'                                                         |
| ARC49          | 5'- <u>AATGATACGGCGACCACCGAGATCTACACTCTTTCCTACACGACGCTCTTCCGATCT</u> -3'                       |
| ARC78          | 5'- <i>CAAGCAGAAGACGGCATACGAGAT</i> <b><u>CGTGAT</u></b> GTGACTGGAGTTCAGACGTGTGCTCTTCCGATCT-3' |
| ARC84          | 5'- <i>CAAGCAGAAGACGGCATACGAGAT</i> <b><u>ACATCGG</u></b> TGACTGGAGTTCAGACGTGTGCTCTTCCGATCT-3' |
| ARC85          | 5'- <i>CAAGCAGAAGACGGCATACGAGAT</i> <b><u>GCCTAAG</u></b> TGACTGGAGTTCAGACGTGTGCTCTTCCGATCT-3' |
| ARC86          | 5'- <i>CAAGCAGAAGACGGCATACGAGAT</i> <b><u>TGGTC</u></b> AGTGACTGGAGTTCAGACGTGTGCTCTTCCGATCT-3' |

**Table S3. Oligonucleotide sequences for CPD-seq.** Illumina *P5* and *P7* adapters are indicated underlined and italicized respectively, and **indexes** are shown in bold and underline. Oligo 5' modifications are also indicated. All oligos were from Integrated DNA technologies (Coralville, IA).
